# Supplementary material for: Protein Phosphatase 4 Promotes Chromosome Pairing and Synapsis, and Contributes to Maintaining Crossover Competence with Increasing Age
Source: PubMed Central journal article supplement (PMC4207613; doi:10.1371/journal.pgen.1004638), 2014-10-23
Supplement: pgen.1004638.s008.pdf [file pgen.1004638.s008.pdf]

**Table S1*****pph-4.1* visible phenotypes**

| <b>Genotype</b>                                      | <b>%Embryonic viability</b> | <b>%Male progeny</b> | <b>%Larval arrest progeny</b> | <b>%Dpy progeny</b> |
|------------------------------------------------------|-----------------------------|----------------------|-------------------------------|---------------------|
| wild-type (N2)<br>(self-progeny)                     | 100 (1244)                  | 0.16 (1244)          | 0 (1244)                      | 0 (1244)            |
| <i>pph-4.1(tm1598)</i><br>(self-progeny)             | 3.0 (1374)                  | 23.8 (42)            | 6.7 (42)                      | 2.4 (42)            |
| <i>pph-4.1(tm1598)</i><br>(mated to wild-type males) | 9.8 (1065)                  | 63.7 (104)           | 0 (104)                       | 0 (104)             |
